# Supplementary material for: An Ultrasensitive Biosensor for Detection of Femtogram Levels of the Cancer Antigen AGR2 Using Monoclonal Antibody Modified Screen-Printed Gold Electrodes
Source: MDPI journal article supplement (doi:10.3390/bios11060184), 2021-06-07
Supplement: s1 [file s1]

# An Ultrasensitive Biosensor for Detection of Femtogram Levels of the Cancer Antigen AGR2 Using Monoclonal Antibody Modified Screen-Printed Gold Electrodes

Wioleta Białobrzaska <sup>1,\*</sup>, Karolina Dziąbowska <sup>2</sup>, Małgorzata Lisowska <sup>3</sup>, M. Aiman Mohtar <sup>4</sup>, Petr Muller <sup>5</sup>, Borivoj Vojtesek <sup>5</sup>, Radovan Krejcir <sup>5</sup>, Robert O' Neill <sup>6</sup>, Ted R. Hupp <sup>3,7</sup>, Natalia Malinowska <sup>1</sup>, Ewelina Bięga <sup>1</sup>, Daniel Bigus <sup>1</sup>, Zofia Cebula <sup>1</sup>, Katarzyna Pala <sup>2</sup>, Elżbieta Czaczyk <sup>2</sup>, Sabina Żołędowska <sup>1</sup> and Dawid Nidzworski <sup>1</sup>

<sup>1</sup> Institute of Biotechnology and Molecular Medicine, 3 Trzy Lipy St., 80-172 Gdansk, Poland; n.malinowska@ibmm.pl (N.M.); e.biega@ibmm.pl (E.B.); d.bigus@ibmm.pl (D.B.); z.cebula@ibmm.pl (Z.C.); sabina.zoledowska@etongroup.eu (S.Ż.); dawid@etongroup.eu (D.N.)

<sup>2</sup> SensDx, 14b Postępu St., 02-676 Warszawa, Poland; karolina.dziabowska@gmail.com (K.D.); katarzyna.pala@etongroup.eu (K.P.); ela@etongroup.eu (E.C.)

<sup>3</sup> International Centre for Cancer Vaccine Science, University of Gdansk, Kładki 24 St., 80-822 Gdańsk, Poland; malgorzata.lisowska@ug.edu.pl (M.L.); ted.hupp@ed.ac.uk (T.R.H.)

<sup>4</sup> UKM Medical Centre, UKM Medical Molecular Biology Institute (UMBI), Universiti Kebangsaan Malaysia, 56000 Cheras, Kuala Lumpur, Malaysia; m.aimanmohtar@ppukm.ukm.edu.my

<sup>5</sup> Research Centre for Applied Molecular Oncology, Masaryk Memorial Cancer Institute, 65653 Brno, Czech Republic; pmuller@post.cz (P.M.); vojtesek@mou.cz (B.V.); radovan.krejcir@mou.cz (R.K.)

<sup>6</sup> Cambridge Oesophagogastric Centre, Cambridge University Hospitals NHS Foundation Trust, Cambridge CB2 0QQ, UK; robertoneill@nhs.net

<sup>7</sup> Institute of Genetics and Molecular Medicine, University of Edinburgh, Edinburgh, EH4 2XR, UK

\* Correspondence: w.bialobrzaska@ibmm.pl

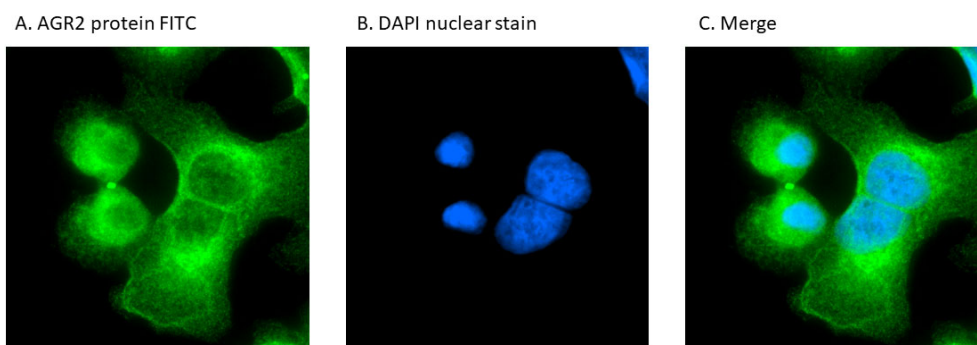

**Figure S1.** Immunohistochemical expression of AGR2 protein in A549 cells. The A549 cells were fixed with 4% (v/v) paraformaldehyde in PBS at RT for 15 min, washed with PBS three times, and permeabilized using 0.25% triton X-100 in PBS at RT for 10 min. Then, the cells were again washed with PBS three times and blocked with 3% BSA in PBS for 1 h. The primary antibody was incubated at appropriate dilution (typically 1:1000) overnight at 4°C. Alexa Fluor 488 goat anti-mouse (Invitrogen, USA) secondary antibody was incubated at RT for 1 h. Coverslips were washed three times with PBS in between each step. Cells were incubated in DAPI (image B and C) (Invitrogen, USA) diluted at 1:10,000 with dH<sub>2</sub>O for 5 min to stain the nucleus. An additional 3 washes with dH<sub>2</sub>O for 5 min were performed. A single drop of Fluorescence Mounting Medium (S3023, Dako, Denmark) was used to mount the cells on the slide. The fluorescent signal (image A and C) was detected using a Zeiss Axioplan 2 microscope (63x or 100x oil immersion objective). Images were acquired by Micro-Manager 1.4 software. Images were processed in ImageJ 2.0 software.
